# Supplementary material
Source: Springer Nature journal article supplement (https://www.springermedizin.de/resource/supplementary/13002_2006_41_MOESM2_ESM.pdf/9627036)
Supplement: MOESM2 [file 9627036]

**Phytochemicals and Activities of Two  
Medicinal Plants Occurring in Northwest British Columbia  
Which Are Not Utilized by the Gitksan.**

Potential clinically useful properties are indicated by underlining; potentially toxic or undesirable activities are shown by use of *italics*. Hormonal activities affecting reproduction shown with double underline. Properties whose clinical relevance is not clear to me are left unmarked. Other properties (shown in parentheses). Properties taken from [21].

*Arctostaphylos uva-ursi*

Kinnikinnik or bearberry

|                              |                                                                                                                                                                                                                                                                                                                                                                                                                                                                                                                                                                                                                                                                                                                |
|------------------------------|----------------------------------------------------------------------------------------------------------------------------------------------------------------------------------------------------------------------------------------------------------------------------------------------------------------------------------------------------------------------------------------------------------------------------------------------------------------------------------------------------------------------------------------------------------------------------------------------------------------------------------------------------------------------------------------------------------------|
| allantoin<br>plant           | <u>antiinflammatory</u> , <u>antipeptic</u> , <u>antipsoriac</u> , <u>antiulcer</u> ,<br><u>immunostimulant</u> , <u>keratolytic</u> , <u>superative</u> , <u>vulnerary</u>                                                                                                                                                                                                                                                                                                                                                                                                                                                                                                                                    |
| arbutin<br>5-12% leaf        | <u>antiseptic</u> , <u>antitussive</u> , <u>artemicide</u> , <u>bactericide</u> ,<br><u>candidicide</u> , <u>diuretic</u> , <u>insulin sparing</u> , (pesticide), <u>urinary-antiseptic</u>                                                                                                                                                                                                                                                                                                                                                                                                                                                                                                                    |
| alpha-amyrin<br>β-sitosterol | <u>antitumor</u> , <i>cytotoxic</i><br><u>androgenic</u> , <u>anorexic</u> , <u>antiadenomic</u> , <u>antiandrogenic</u> ,<br><u>antifeedant</u> , <u>antifertility</u> , <u>antigonadotrophic</u> , <u>antiinflammatory</u> ,<br><u>antileukemic</u> , <u>antimutagenic</u> , <u>antiprogestational</u> ,<br><u>antiprotastadenomic</u> , <u>antiprostatiitic</u> , <u>antitumor</u> , <u>antiviral</u> , <u>artemicide</u> ,<br><u>bactericide</u> , <u>cancer-preventative</u> , <u>candidicide</u> , <u>estrogenic</u> , <u>gonadotrophic</u> ,<br><u>hepatoprotective</u> , <u>hyopcholesterolemic</u> , <u>hypoglycemic</u> , <u>hypolipedemic</u> ,<br>(pesticide), <u>spermicide</u> , <u>viricide</u> |
| betulinic acid               | <u>antitumor</u> , <i>cytotoxic</i>                                                                                                                                                                                                                                                                                                                                                                                                                                                                                                                                                                                                                                                                            |
| citric acid<br>leaf          | antiaphthic, <u>anticalculic</u> , <u>anticoagulant</u> , <u>antioxidant</u> ,<br><u>antitumor</u> , <u>disinfectant</u> , <u>hemostat</u> , <u>litholytic</u> , refrigerant                                                                                                                                                                                                                                                                                                                                                                                                                                                                                                                                   |
| formic acid<br>leaf          | <u>antiseptic</u> , <u>antisynopic</u> , <u>counterirritant</u> , (pesticide)                                                                                                                                                                                                                                                                                                                                                                                                                                                                                                                                                                                                                                  |
| gallic acid<br>plant         | ACE inhibitor, anticarcinomic, antifibrinolytic,<br>antioxidant, antiseptic, antiviral, astringent, bacteristatic, cancer-<br>preventative, but <i>carcinogenic</i> , hemostat, <i>nephrotoxic</i> , (pesticide), styptic                                                                                                                                                                                                                                                                                                                                                                                                                                                                                      |
| hyperin<br>leaf              | antiinflammatory, antioxidant, antitussive, antiviral,<br>capillary fortifier, capillarigenic, diuretic, hepatoprotective, hypotensive,<br>(pesticide), viricide                                                                                                                                                                                                                                                                                                                                                                                                                                                                                                                                               |
| isoquercitrin<br>leaf        | <u>antifeedant</u> , <u>cancer-preventative</u> , <u>capillarigenic</u> ,<br><u>diuretic</u> , <u>hypotensive</u> , (pesticide)                                                                                                                                                                                                                                                                                                                                                                                                                                                                                                                                                                                |
| lupeol<br>plant              | <u>antitumor</u> , <u>antiurethrotic</u> , <i>cytotoxic</i>                                                                                                                                                                                                                                                                                                                                                                                                                                                                                                                                                                                                                                                    |
| malic acid<br>leaf           | <u>bacteristat</u> , <u>bruchiphobe</u> , <u>hemopoietic</u> , (pesticide),<br>sialagogue                                                                                                                                                                                                                                                                                                                                                                                                                                                                                                                                                                                                                      |
| monotropein<br>leaf          | <u>cathartic</u>                                                                                                                                                                                                                                                                                                                                                                                                                                                                                                                                                                                                                                                                                               |
| myricetin                    | <u>antifeedant</u> , <u>antigastric</u> , <u>antiinflammatory</u> , <u>cancer</u>                                                                                                                                                                                                                                                                                                                                                                                                                                                                                                                                                                                                                              |

|                                  |                                                                                                                                                                                                                                                                                                                                                                                                                                                                                                                                                                                                                                                                                                                                                                                                                                                                                                                                                                                               |
|----------------------------------|-----------------------------------------------------------------------------------------------------------------------------------------------------------------------------------------------------------------------------------------------------------------------------------------------------------------------------------------------------------------------------------------------------------------------------------------------------------------------------------------------------------------------------------------------------------------------------------------------------------------------------------------------------------------------------------------------------------------------------------------------------------------------------------------------------------------------------------------------------------------------------------------------------------------------------------------------------------------------------------------------|
| leaf                             | <u>preventative, diuretic</u> , (larvostat and pesticide)                                                                                                                                                                                                                                                                                                                                                                                                                                                                                                                                                                                                                                                                                                                                                                                                                                                                                                                                     |
| oleanolic-acid<br>plant          | <u>abortifacient, anticariogenic, antifertility, antihepatotoxic, antisarcomic, cancer-preventative, cardiogenic, diuretic, hepatoprotective, uterotonic</u>                                                                                                                                                                                                                                                                                                                                                                                                                                                                                                                                                                                                                                                                                                                                                                                                                                  |
| quercetin<br>leaf                | 5-lipoxygenase inhibitor, aldose-reductase inhibitor, (allelochemic), <u>anti-tumor promotor, anti-Crohn's, anti-PMS, antiaggregant, antiallergic, antianalylactic, antiasthmatic, anticataract, anticolitic, antidermatitic, antidiabetic, antiestrogenic, antifeedant, antifu, anti-rabies, antiherpetic, antipolio, antiviral, HIV reverse transcriptase inhibitor, antigastric, antihepatotoxic, antihistaminic and antiinflammatory, antileukotrienic, antilipoperoxidant, antioxidant, antiperiodontal and antiplaque, antipermeability, antipharyngitic, antipodriac, antisporiac, antitumor, antiradicular, bactericide, calmodulin-antagonist, cancer preventative, protects capillaries, cyclooxygenase-inhibitor, cytotoxic, hypoglycemic, insulinogenic</u> (juvabional, larvostat, pesticide), lipoxygenase inhibitor, <u>mast-cell stabilizer, mutagenic, spasmolytic, teratologic, tumorigenic, vasodilator</u> , xanthine oxidase inhibitor, CAMP phosphodiesterase inhibitor |
| quinic acid                      | <u>choleric</u>                                                                                                                                                                                                                                                                                                                                                                                                                                                                                                                                                                                                                                                                                                                                                                                                                                                                                                                                                                               |
| tannin<br>6-20% bark             | <u>antidiarrheic, antidysenteric, antimutagenic, anti-nephritic, antioxidant</u> , antiradicular, <u>antiviral, bactericide, cancer-preventative, hepatoprotective</u> , (pesticide), <u>psychotropic, viricide</u> .                                                                                                                                                                                                                                                                                                                                                                                                                                                                                                                                                                                                                                                                                                                                                                         |
| ursolic acid                     | <u>antidiabetic, antiinflammatory, antileukemic, antiobesity?, antitumor, CNS depressant, cancer-preventative, cytotoxic, diuretic, hepatoprotective, hypoglycemic</u> (piscicide)                                                                                                                                                                                                                                                                                                                                                                                                                                                                                                                                                                                                                                                                                                                                                                                                            |
| uvaol                            | <u>antitumor, cytotoxic</u>                                                                                                                                                                                                                                                                                                                                                                                                                                                                                                                                                                                                                                                                                                                                                                                                                                                                                                                                                                   |
| <i>Mentha arvensis</i>           |                                                                                                                                                                                                                                                                                                                                                                                                                                                                                                                                                                                                                                                                                                                                                                                                                                                                                                                                                                                               |
| wild mint, field mint            |                                                                                                                                                                                                                                                                                                                                                                                                                                                                                                                                                                                                                                                                                                                                                                                                                                                                                                                                                                                               |
| 1,8-cineole                      | (allelopathic) <u>anesthetic, antibronchitic, anticatarrh, antilarngitic, antipharyngitic, antirhinitic, antiseptic, antitussive, bactericide, CNS-stimulant, choleric, counterirritant, dentifrice, expectorant, fungicide, liver toner, hypotensive</u> , (insect repellent and pesticide), <u>rubifacient, sedative</u>                                                                                                                                                                                                                                                                                                                                                                                                                                                                                                                                                                                                                                                                    |
| acetic acid<br>plant             | acidulant, <u>antiototic, antivaginitic, bactericide, expectorant, fungicide, mucolytic, osteolytic</u> , (pesticide), <u>protistacide, spermicide, ulcerogenic, verrucolytic</u>                                                                                                                                                                                                                                                                                                                                                                                                                                                                                                                                                                                                                                                                                                                                                                                                             |
| alpha-pinene<br>plant 10-300 ppm | <u>antiinflammatory, cancer-preventative</u> (coleoptiphile, insectifuge, insectiphile, pesticide)                                                                                                                                                                                                                                                                                                                                                                                                                                                                                                                                                                                                                                                                                                                                                                                                                                                                                            |
| camphene                         | <u>spasmogenic</u>                                                                                                                                                                                                                                                                                                                                                                                                                                                                                                                                                                                                                                                                                                                                                                                                                                                                                                                                                                            |
| carvone<br>leaf<br>0.81-2.6%     | <u>antiseptic, CNS stimulant, cancer-preventative, carminative</u> (insecticide, insect repellent, pesticide) <u>vermicide</u>                                                                                                                                                                                                                                                                                                                                                                                                                                                                                                                                                                                                                                                                                                                                                                                                                                                                |

|                                     |                                                                                                                                                                                                                                                                                                                                                                                          |
|-------------------------------------|------------------------------------------------------------------------------------------------------------------------------------------------------------------------------------------------------------------------------------------------------------------------------------------------------------------------------------------------------------------------------------------|
| caryophyllene<br>plant              | <u>antiedemic, antiinflammatory</u> (insect repellent, perfumery, pesticide, termitifuge) <u>spasmolytic</u>                                                                                                                                                                                                                                                                             |
| eugenol<br>essential oil            | <u>analgesic, anaesthetic, antiaggregant, antiedemic, antifeedant, antiinflammatory, antioxidant, anti prostaglandin, antiseptic, antiulcer, cancer-preventative, candidicide, choleric, cytotoxic, febrifuge, fungicide</u> , (apifuge, insectifuge, juvabional, larvicide, pesticide, herbicide), <u>irritant, ulcerogenic, vermifuge</u>                                              |
| formic acid<br>plant                | <u>antiseptic, antisynoptic, counterirritant</u> (pesticide)                                                                                                                                                                                                                                                                                                                             |
| furfural<br>plant 2-5ppm            | <u>antiseptic, fungicide</u> (insecticide, pesticide)                                                                                                                                                                                                                                                                                                                                    |
| hesperidin<br>plant                 | <u>antiDNA, antiRNA, anti allergic, antioxidant, antistomatitic, antiviral, capillariportective, choleric</u> (pesticide), <u>vasopressor</u>                                                                                                                                                                                                                                            |
| limonene<br>leaf<br>20-3520 ppm     | <u>acetylcholinesterase inhibitor--anti-Alzheimerian?, anticancer, antilithic, antiviral, viricide, bactericide, cancer-preventative</u> , (herbicide, insecticide, insect repellent, pesticide), <u>irritant, sedative, spasmolytic</u>                                                                                                                                                 |
| linalool<br>leaf                    | <u>antiseptic, antiviral and viricide, bactericide, cancer-preventative, fungicide</u> , (insect repellent, perfumery, pesticide, termite repellent), <u>sedative, spasmolytic, tumor-promoter</u>                                                                                                                                                                                       |
| luteolin<br>shoot                   | aldose-reductase inhibitor, <u>antifeedant, antihistaminic, antiinflammatory, antioxidant, antitussive, cancer-preventative, choleric, diuretic</u> , (pesticide), <u>spasmolytic</u> , xanthine oxidase inhibitor                                                                                                                                                                       |
| menthol<br>leaf<br>1,000-24,385 ppm | <u>allergenic, analgesic, anaesthetic, antibronchitic, antiinflammatory, antineuralgic, antidontalgic, antipruritic, antirheumatic, antiseptic, antisinusitic, bradycardic, bronchomucolytic, bronchorrheic, CNS depressant, calcium-antagonist?, carminative, counterirritant, gastro sedative, myelorelaxant</u> , (perfumery, pesticide), <u>rubifacient, spasmolytic, vibriocide</u> |
| menthone<br>plant<br>71-24,000 ppm  | <u>analgesic, antiseptic, cancer-preventative, sedative, spasmolytic</u>                                                                                                                                                                                                                                                                                                                 |
| myrcene<br>leaf<br>10-2,485 ppm     | <u>analgesic, antimutanegic, antinociceptive, bactericide</u> (insect repellent, insecticide, pesticide) <u>spasmolytic</u>                                                                                                                                                                                                                                                              |
| p-cymene<br>leaf, 9-29ppm           | <u>analgesic, antifu, antiviral and viricide, antirheumatologic, bactericide, fungicide</u> (herbicide, insect repellent, pesticide)                                                                                                                                                                                                                                                     |
| piperitone<br>leaf, 13-1285 ppm     | <u>antiasthmatic</u>                                                                                                                                                                                                                                                                                                                                                                     |

|                                                        |                                                                                                                                                                                                                                                                                                                                                                                                   |
|--------------------------------------------------------|---------------------------------------------------------------------------------------------------------------------------------------------------------------------------------------------------------------------------------------------------------------------------------------------------------------------------------------------------------------------------------------------------|
| pulegone<br>plant<br>100-24460 ppm                     | <u>antiacetylcholinesterase inhibitor--anti Alzheimerian?</u> ,<br><u>antihistaminic</u> , <u>antipyretic</u> , <u>cancer-preventative</u> ,<br><i>cerebrotoxic</i> , <i>hepatotoxic</i> (avifuge, herbicide, insecticide and insect<br>repellant, pesticide), <u>flea repellant</u> , <u>sedative</u>                                                                                            |
| rosmarinic acid<br>plant 28,000 ppm<br>leaf 71-228 ppm | <u>antianaphylactic</u> , anticomplementary, <u>antiedemic</u> ,<br><i>antigonadotrophic</i> , <u>antihepatotoxic</u> , <u>antiherpetic</u> ,<br><u>antiviral</u> , <u>viricide</u> , <u>antiinflammatory</u> , antileukotrienic,<br>antilipoperoxidant, <u>antioxidant</u> , antiradicular, <u>antishock</u> , antithreotropic,<br><u>bactericide</u> , <u>cancer-preventative</u> , (pesticide) |
| thujone<br>plant                                       | <i>cerebrodepressant</i> , <i>convulsant</i> , <i>epileptigenic</i> ,<br><i>hallucinogenic</i> , (herbicide, pesticide), <i>respirainhibitor</i> , <u>spasmolytic</u>                                                                                                                                                                                                                             |
